# Supplementary material for: Anti-Fibrosis Effects of Magnesium Lithospermate B in Experimental Pulmonary Fibrosis: By Inhibiting TGF-βRI/Smad Signaling
Source: PubMed Central journal article supplement (PMC8003516; doi:10.3390/molecules26061715), 2021-03-19
Supplement: molecules-26-01715-s001.pdf [file molecules-26-01715-s001.pdf]

# Anti-Fibrosis Effects of Magnesium Lithospermate B in Experimental Pulmonary Fibrosis: By Inhibiting TGF- $\beta$ RI/Smad Signaling

Xin Luo <sup>1,2</sup>, Qiangqiang Deng <sup>1</sup>, Yaru Xue <sup>1,2</sup>, Tianwei Zhang <sup>1,2</sup>, Zhitao Wu <sup>3</sup>, Huige Peng <sup>1</sup>, Lijiang Xuan <sup>1,2,\*</sup> and Guoyu Pan <sup>1,2,\*</sup>

<sup>1</sup> State Key Laboratory of Drug Research, Shanghai Institute of Materia Medica, Chinese Academy of Science, 501 Haik Road, Shanghai 201203, China; luoxin17123@163.com (X.L.); qqdeng@simm.ac.cn (Q.D.); xueyaru3@simm.ac.cn (Y.X.); s19-zhangtianwei@simm.ac.cn (T.Z.); huigepeng@163.com (H.P.); ljxuan@simm.ac.cn (L.X.)

<sup>2</sup> School of Pharmacy, University of Chinese Academy of Sciences, Beijing 100049, China

<sup>3</sup> School of Chinese Materia Medica, Nanjing University of Chinese Medicine, Nanjing 210033, China; zhitaowu@simm.ac.cn

\* Correspondence: ljxuan@simm.ac.cn (L.X.); gypan@simm.ac.cn (G.P.)

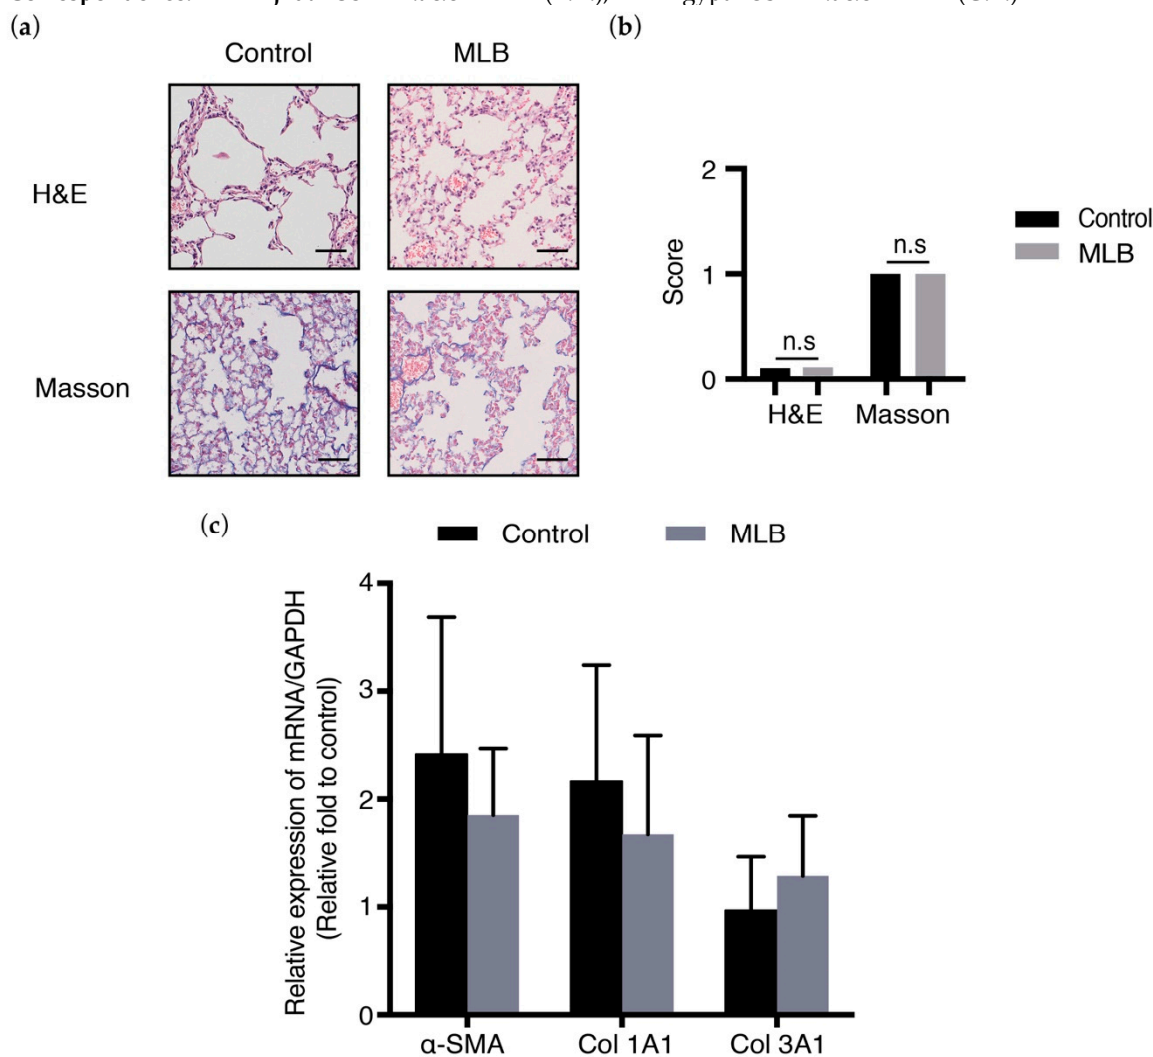

**Figure S1.** MLB had no effects in normal mice. mice in MLB group were treated with MLB for seven days (i.p. 50 mg/kg/day), and mice in control group were given saline(n=3). (a) Representative images of hematoxylin and eosin (H&E) and Masson's trichrome stained lung tissue slides. Bars = 50  $\mu$ m,

magnification: 20 ×. **(b)** Pathological score assessment about inflammation and fibrosis variables of each lung slices. **(c)** Relative mRNA expression of Col 1A1, Col 3A1 and  $\alpha$ -SMA in mouse lung tissues from different groups was determined by real-time quantitative PCR. Data are presented as the means  $\pm$  SEM of the group and compared by one-way ANOVA. n.s P>0.05 vs. Control.

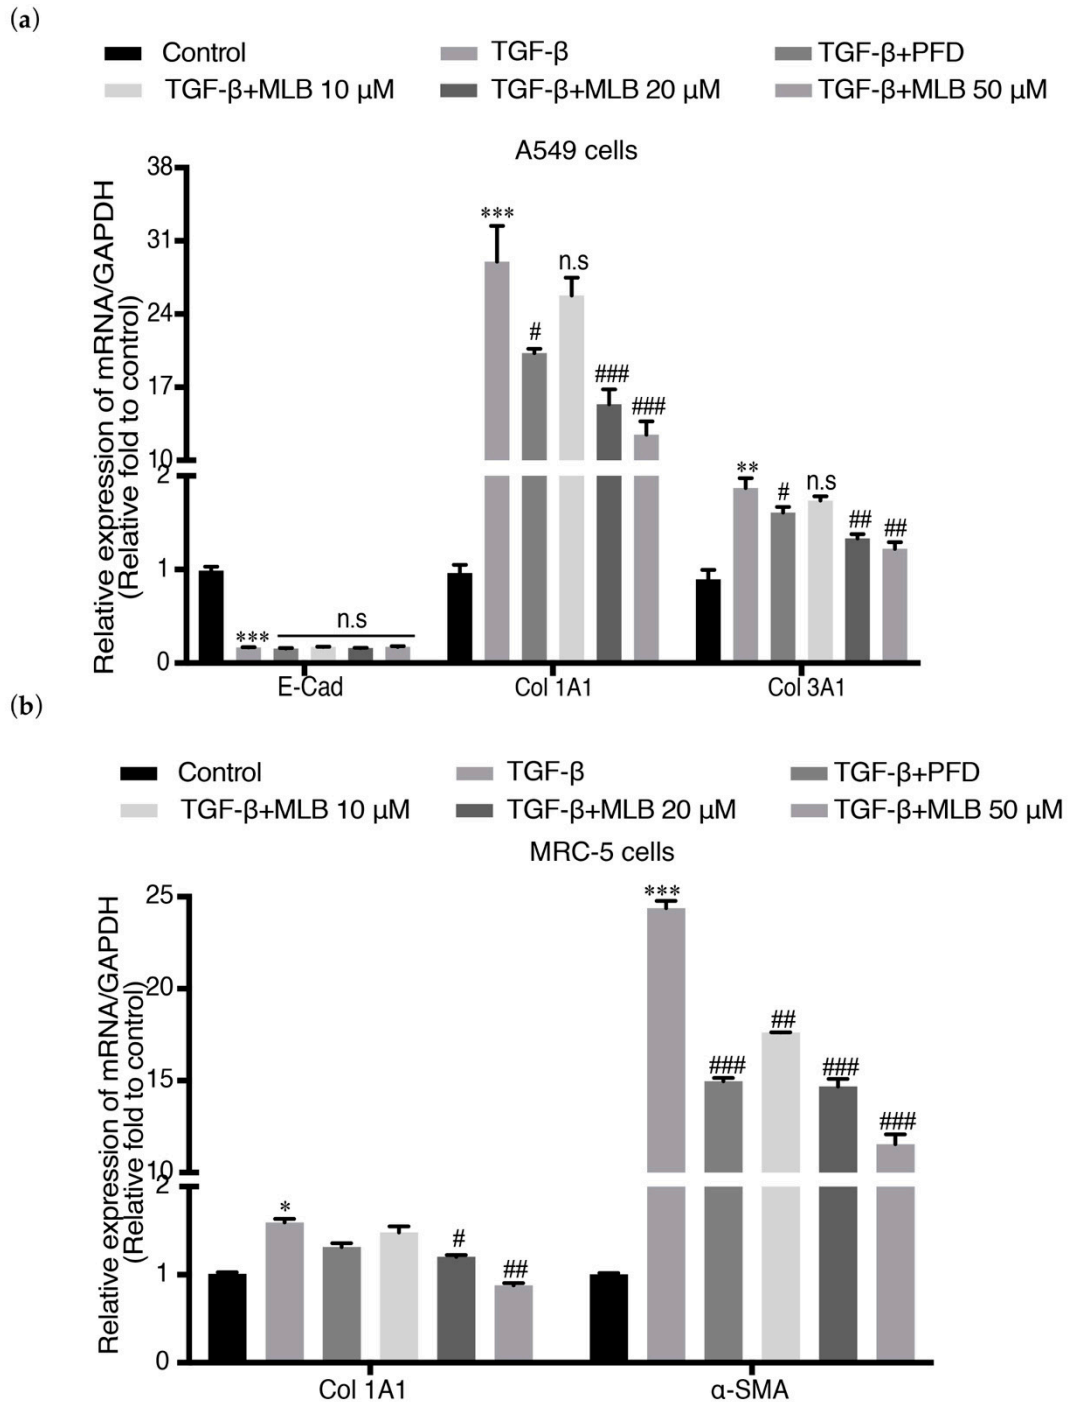

**Figure S2.** MLB could dose-dependently inhibit transcripts of fibrosis in A549 (a) cells and MRC-5 (b) cells. Quiescent cells were treated with TGF- $\beta$  or both TGF- $\beta$  and MLB with different dosages for 24 h (A549 cells) or 48 h (MRC-5 cells). Data are presented as means  $\pm$  SEM of the group and compared by One-Way ANOVA (n = 4); \*P < 0.05, \*\*P < 0.01, \*\*\*P < 0.001 vs. Control; n.s P>0.05, #P < 0.05, ##P < 0.01, ###P < 0.001 vs. TGF- $\beta$ .

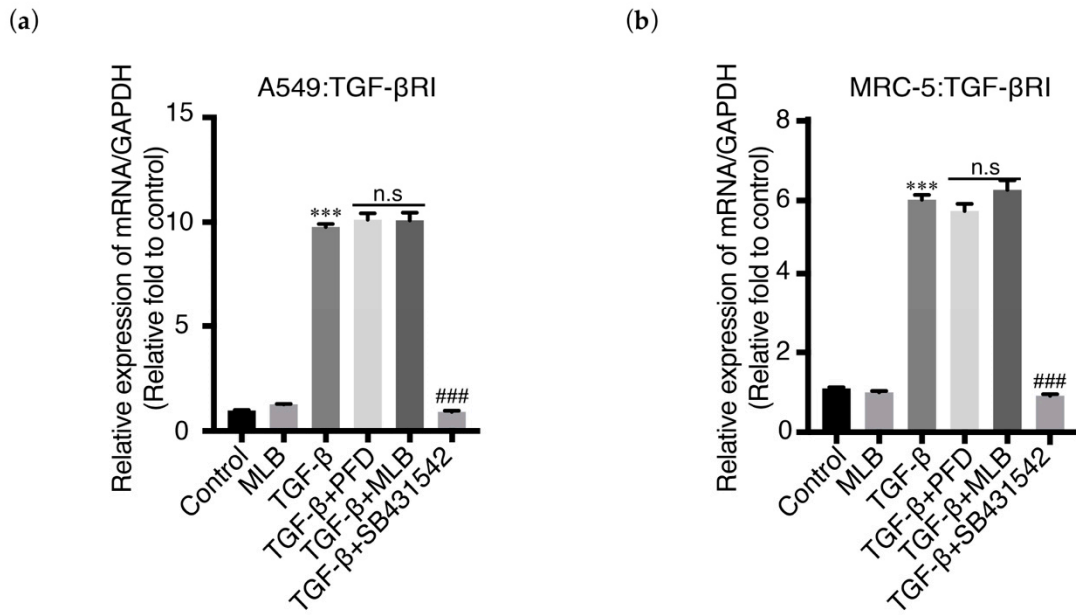

**Figure S3.** MLB could not affect the mRNA level of TGF-βRI in TGF-β stimulated A549 cells(a) and MRC-5 cells(b). Quiescent cells were treated with MLB (50 μM) alone, TGF-β, or both TGF-β and MLB (50 μM), PFD (50 μM) and SB431542 (20 μM) for 24 h (A549 cells) or 48 h (MRC-5 cells). Data are presented as means ± SEM of the group and compared by One-Way ANOVA (n = 4); \*\*\*P < 0.001 vs. Control; n.s P>0.05, ###P < 0.001 vs. TGF-β.

**Table S1.** PCR primer pairs used for research (H: Human; M: Mice).

| Primer sequence   |         |                                      |
|-------------------|---------|--------------------------------------|
| H- $\alpha$ -SMA  | Forward | 5'- ATG CTC CCA GGG CTG TTT TC-3'    |
|                   | Reverse | 5'-CTT TTG CTC TGT GCT TCG TC-3'     |
| H-CDH 1           | Forward | 5'- GAG AAC GCA TTG CCA CAT ACA C-3' |
|                   | Reverse | 5'- GAG CAC CTT CCA TGA CAG ACC C-3' |
| H-Col 1A1         | Forward | 5'- TGA CGA GAC CAA GAA CTG CC-3'    |
|                   | Reverse | 5'- GCA CCA TCA TTT CCA CGA GC-3'    |
| H-Col 3A1         | Forward | 5'- CGC CCT CCT AAT GGT CAA GG-3'    |
|                   | Reverse | 5'- TTC TGA GGA CCA GTA GGG CA-3'    |
| H-GAPDH           | Forward | 5'- AAG AAG GTG GTG AAG CAG G-3'     |
|                   | Reverse | 5'- AGG TGG AGG AGT GGG TGT CG-3'    |
| H-TGF- $\beta$ 1  | Forward | 5'- CAG CAA CAA TTC CTG GCG ATA-3'   |
|                   | Reverse | 5'- GCT AAG GCG AAA GCC CTC AAT-3'   |
| H-TGF- $\beta$ RI | Forward | 5'-ACT TCC AAC TAC TGG CCC TT-3'     |
|                   | Reverse | 5'-ATG GTG AAT GAC AGT GCG GT-3'     |
| H-Vimentin        | Forward | 5'- TGC GTG AAA TGG AAG AGA ACT-3'   |
|                   | Reverse | 5'- TCA GGT TCA GGG AGG AAA AGT-3'   |
| M- $\alpha$ -SMA  | Forward | 5'- GTT TCG GGA GCA GAA CAG AGG-3'   |
|                   | Reverse | 5'- GAA GCT GGC CGT TCA CTC TA-3'    |
| M-Col 1A1         | Forward | 5'- CAA TGG CAC GGC TGT GTG CG-3'    |
|                   | Reverse | 5'- AGC ACT CGC CCT CCC GTC TT-3'    |
| M-Col 3A1         | Forward | 5'- GAG GAA TGG GTG GCT ATC CG-3'    |
|                   | Reverse | 5'- TTG CGT CCA TCA AAG CCT CT-3'    |
| M-GAPDH           | Forward | 5'-AGG TCG GTG TGA ACG GAT TTG-3'    |
|                   | Reverse | 5'- GGG GTC GTT GAT GGC AAC A-3'     |
| M-TGF- $\beta$ 1  | Forward | 5'- CCA CCT GCA AGA CCA TCG AC-3'    |
|                   | Reverse | 5'- CTG GCG AGC CTT AGT TTG GAC-3'   |
| M-IL-4            | Forward | 5'-ATG GAT GTG CCA AAC GTC CT-3'     |
|                   | Reverse | 5'-AAG CAC CTT GGA AGC CCT AC-3'     |
| M-IL-6            | Forward | 5'-CCT ACC CCA ATT TCC AAT GCT C-3'  |
|                   | Reverse | 5'-GGT CTT GGT CCT TAG CCA CT-3'     |

M-IL-13                      Forward                      5'-GAA TCC AGG GCT ACA CAG AAC-3'  
Reverse                      5'-AAC ATC ACA CAA GAC CAG ACT C-3'

---

**Table S2.** Information about relative antibodies used for research. (WB: Western blot analysis; IF: Cell immunofluorescence staining; H: human; M: mouse; R: rat.).

| <b>Antidody</b> | <b>Applications</b> | <b>Specics</b> | <b>Specificity</b> | <b>Suppliers</b>          | <b>Catalog Number</b> | <b>Dilution Ratio</b>    |
|-----------------|---------------------|----------------|--------------------|---------------------------|-----------------------|--------------------------|
| ACTA2           | WB,IF               | Rabbit         | H,M,R              | Proteintech               | 14395-1-AP            | 1:2000(WB);<br>1:100(IF) |
| Akt             | WB                  | Rabbit         | H,M,R              | Cell Signaling Technology | #4691                 | 1:1000                   |
| Col 1A1         | WB,IF               | Rabbit         | H,M,R              | Proteintech               | 14695-1-AP            | 1:2000(WB);<br>1:50(IF)  |
| E-Cad           | WB                  | Rabbit         | H,M,R              | Proteintech               | 20874-1-AP            | 1:5000                   |
| Fibronectin     | WB,IF               | Rabbit         | H,M,R              | Proteintech               | 15613-1-AP            | 1:2000(WB);<br>1:50(IF)  |
| GAPDH           | WB                  | Rabbit         | H,M,R              | Cell Signaling Technology | #2118                 | 1:1000                   |
| JNK             | WB                  | Rabbit         | H,M,R              | Cell Signaling Technology | #9252                 | 1:1000                   |
| p-Akt           | WB                  | Rabbit         | H,M,R              | Cell Signaling Technology | #4060                 | 1:1000                   |
| p-JNK           | WB                  | Rabbit         | H,M,R              | Cell Signaling Technology | #4668                 | 1:1000                   |
| p-Smad2         | WB                  | Rabbit         | H,M,R              | Cell Signaling Technology | #3108                 | 1:1000                   |
| Smad2           | WB                  | Rabbit         | H,M,R              | Proteintech               | 12570-1-AP            | 1:2000                   |
| p-Smad3         | WB                  | Rabbit         | H,M,R              | Cell Signaling Technology | #9520                 | 1:2000                   |
| Smad3           | WB                  | Mouse          | H,M,R              | Proteintech               | 66516-1-Ig            | 1:2000                   |
| Smad7           | WB                  | Rabbit         | H,M,R              | Proteintech               | 25840-1-AP            | 1:2000                   |
| TGF-βRI         | WB                  | Rat            | H,M                | R&D                       | AF3025                | 1:1000                   |
